# Supplementary material for: Patient-reported outcome measures after COVID-19: a prospective cohort study
Source: PubMed Central journal article supplement — Eur Respir J. 2020 Nov 26;56(5):2003276. doi: 10.1183/13993003.03276-2020 (PMC7530908; doi:10.1183/13993003.03276-2020), 2020-11-26
Supplement: ERJ-03276-2020.Shareable.pdf [file ERJ-03276-2020.Shareable.pdf]

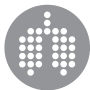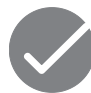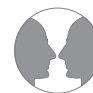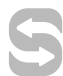

SHAREABLE PDF

# Patient-reported outcome measures after COVID-19: a prospective cohort study

Alyson W. Wong<sup>1,2,5</sup>, Aditi S. Shah<sup>1,5</sup>, James C. Johnston<sup>1,3,4,6</sup>,  
Christopher Carlsten <sup>1,3,6</sup> and Christopher J. Ryerson<sup>1,2,6</sup>

**Affiliations:** <sup>1</sup>Dept of Medicine, University of British Columbia, Vancouver, BC, Canada. <sup>2</sup>Centre for Heart Lung Innovation, University of British Columbia, Vancouver, BC, Canada. <sup>3</sup>UBC School of Population and Public Health, Vancouver, BC, Canada. <sup>4</sup>BC Centre for Disease Control, Vancouver, BC, Canada. <sup>5</sup>Contributed equally to this manuscript. <sup>6</sup>Contributed equally to this manuscript.

**Correspondence:** Christopher J. Ryerson, St. Paul's Hospital, Ward 8B, 1081 Burrard St., Vancouver, Canada V6Z 1Y6. E-mail: [chris.ryerson@hli.ubc.ca](mailto:chris.ryerson@hli.ubc.ca) 1-604-806-8818

 @ERSpublications

**Over 75% of patients admitted to hospital with COVID-19 have abnormal patient-reported outcome measures 3 months after symptom onset, with a third of patients reporting at least moderate impairment in major dimensions of quality of life** <https://bit.ly/32QMMgw>

**Cite this article as:** Wong AW, Shah AS, Johnston JC, *et al.* Patient-reported outcome measures after COVID-19: a prospective cohort study. *Eur Respir J* 2020; 56: 2003276 [<https://doi.org/10.1183/13993003.03276-2020>].

This single-page version can be shared freely online.

*To the Editor:*

Patient reported outcome measures (PROMs) are standardised validated questionnaires completed by patients to provide information on their perceived functional well-being and health status [1]. These questionnaires can address various aspects of health including symptoms, quality of life, functionality, and physical, mental and social well-being. PROMs play an important role in increasing patient engagement, improving health systems, and ensuring that clinical care and research is person-centred.
